# Supplementary material for: A Systematic Study of Ammonia Recovery from Anaerobic Digestate Using Membrane-Based Separation
Source: MDPI journal article supplement (doi:10.3390/membranes12010019), 2021-12-24
Supplement: s1 [file s1]

Article

# A Systematic Study of Ammonia Recovery from Anaerobic Digestate Using Membrane-Based Separation

Fanny Rivera <sup>1,2</sup>, Raúl Muñoz <sup>1,3</sup>, Pedro Prádanos <sup>1,2</sup>, Antonio Hernández <sup>1,2</sup> and Laura Palacio <sup>1,2,\*</sup>

<sup>1</sup> Institute of Sustainable Processes, University of Valladolid, 47011 Valladolid, Spain; fannymaritza.rivera@uva.es (F.R.); mutora@iq.uva.es (R.M.); ppradanos@uva.es (P.P.); antonio.hernandez@uva.es (A.H.)

<sup>2</sup> Department of Applied Physics, Science Faculty, University of Valladolid, 47011 Valladolid, Spain

<sup>3</sup> Department of Chemical Engineering and Environmental Technology, University of Valladolid, 47011 Valladolid, Spain

\* Correspondence: laura.palacio@uva.es (L.P.)

## Supplementary Materials

**Citation:** Rivera, F.; Muñoz, R.; Prádanos, P.; Hernández, A.; Palacio, L. A Systematic Study of Ammonia Recovery from Anaerobic Digestate Using Membrane-Based Separation. *Membranes* **2022**, *12*, 19. <https://doi.org/10.3390/membranes12010019>

Academic Editors: Heitor Bento and Cristiano E. Rodrigues Reis

Received: 9 December 2021

Accepted: 23 December 2021

Published: 24 December 2021

**Publisher's Note:** MDPI stays neutral with regard to jurisdictional claims in published maps and institutional affiliations.

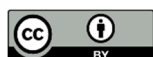

**Copyright:** © 2021 by the authors. Licensee MDPI, Basel, Switzerland. This article is an open access article distributed under the terms and conditions of the Creative Commons Attribution (CC BY) license (<https://creativecommons.org/licenses/by/4.0/>).

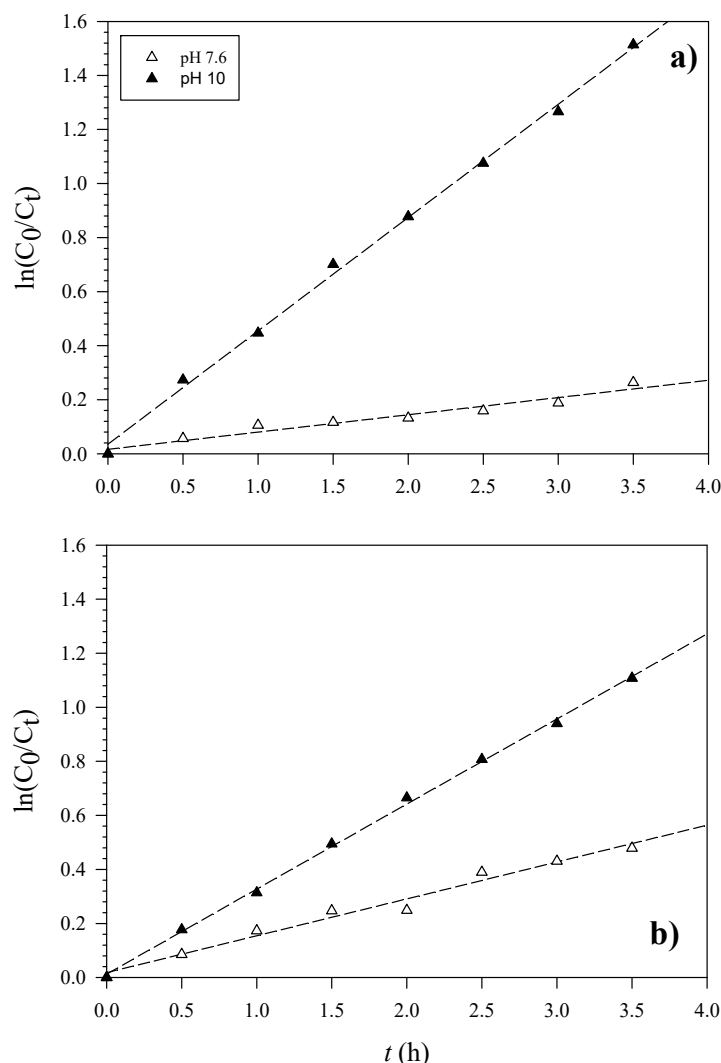

**Figure S1.** Influence of the pH in a) SD and b) RD on the time course of  $\text{NH}_3$  concentration in the feed side of the PTFE-0.22 membrane operated with a concentration of  $\text{H}_2\text{SO}_4$  of 1M and a recirculation

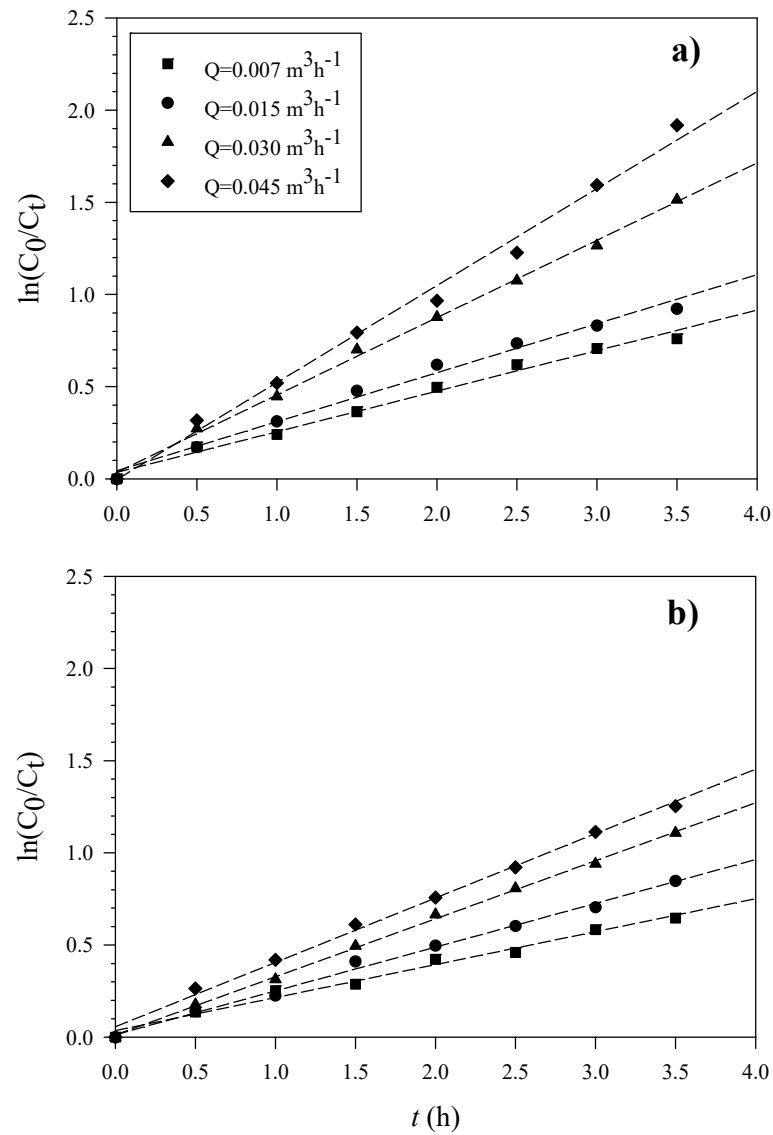

**Figure S2.** Time course of ammonia recovery using a PTFE-0.22 membrane at different recirculation flow rate, pH 10, concentration of  $\text{H}_2\text{SO}_4$  of 1M in a) synthetic digestate and b) real digestate.

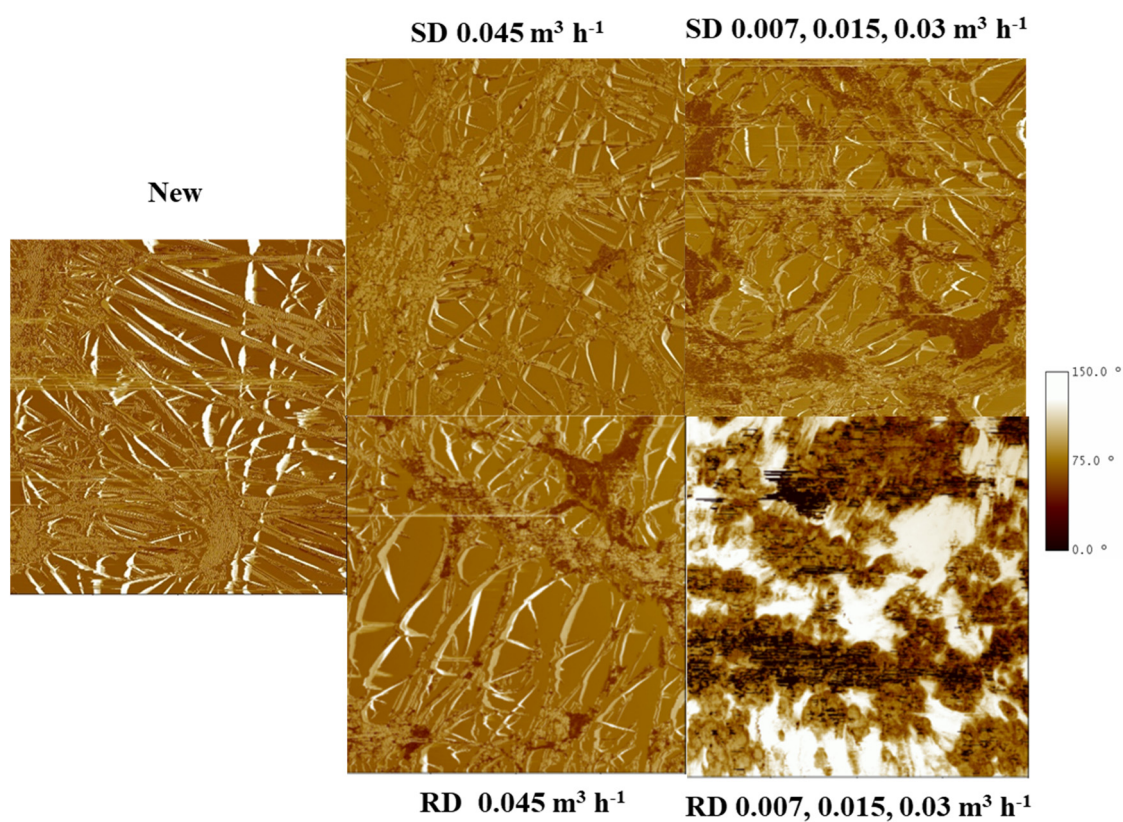

**Figure S3.** AFM Phase Imaging of the active layer for PTFE 0.22 membrane under different conditions (scanned area 10  $\mu\text{m}$   $\times$  10  $\mu\text{m}$ ).
